# Supplementary material for: Speciation of Iron Using Desferal via Simple pH Change and a Single Calibration Curve: High-Throughput Optical Sensor Based on 96-Well Plates and an Overhead Book Scanner as Detector
Source: MDPI journal article supplement (doi:10.3390/chemosensors11120577), 2023-12-14
Supplement: s1 [file s1]

## **SUPPLEMENTARY MATERIAL**

**Speciation of iron using Desferal by simple pH change and a single calibration curve: High-throughput optical sensor based on 96-well plates and overhead book scanner as detector**

**Dimitrios Baltzis<sup>1</sup>, Apostolia Tsiasioti<sup>1</sup>, Constantinos K. Zacharis<sup>2</sup>**

**and Paraskevas D. Tzanavaras<sup>1,\*</sup>**

<sup>1</sup> Laboratory of Analytical Chemistry, School of Chemistry, Faculty of Sciences,  
Aristotle University of Thessaloniki, GR-54124, Greece; [ptzanava@chem.auth.gr](mailto:ptzanava@chem.auth.gr)  
(P.D.T.), [tsiasioti@chem.auth.gr](mailto:tsiasioti@chem.auth.gr) (A.T.), [dimbaltzis@gmail.com](mailto:dimbaltzis@gmail.com) (D.B.)

<sup>2</sup> Laboratory of Pharmaceutical Analysis, School of Pharmacy, Aristotle University of  
Thessaloniki, GR-54124, Greece; [czacharis@pharm.auth.gr](mailto:czacharis@pharm.auth.gr) (C.K.Z.)

\*Correspondence: [ptzanava@chem.auth.gr](mailto:ptzanava@chem.auth.gr); Tel.: +30 2310997721, Fax: +30

2310997719

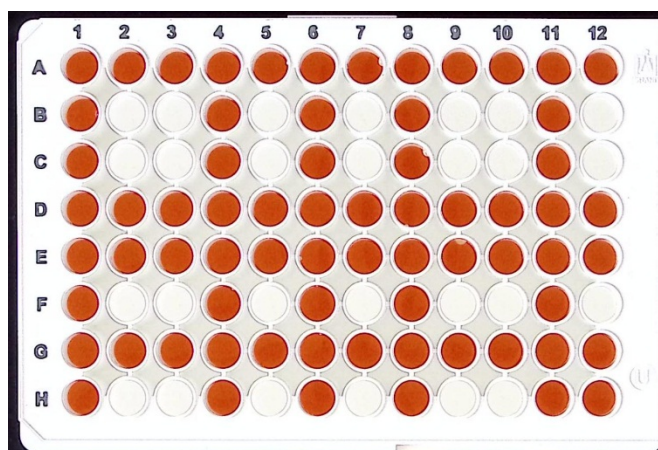

**Figure S1.** Evaluation of the ability of the overhead book scanner to scan the entire area of the 96-well plate (for experimental details please see text).

**Table S1.** Analysis of mixtures of Fe(III)/Fe(II) in aqueous solutions.

| Fe(III) / $\mu\text{M}$ | Fe(II) / $\mu\text{M}$ | R(Fe(III)) / % | R(Fe(II)) / % |
|-------------------------|------------------------|----------------|---------------|
| 25                      | 0                      | 105            | —             |
| 50                      | 0                      | 108            | —             |
| 25                      | 25                     | 90             | 110           |
| 50                      | 50                     | 92             | 94            |
| 50                      | 100                    | 106            | 90            |
| 0                       | 25                     | —              | 107           |
| 0                       | 50                     | —              | 114           |
